# Supplementary figures and images for: A Hierarchical Framework for Evaluation and Informed Decision Making Regarding Smartphone Apps for Clinical Care
Source: Atypon-hosted journal article supplement (doi:10.1176/appi.ps.201700423), 2018-02-15

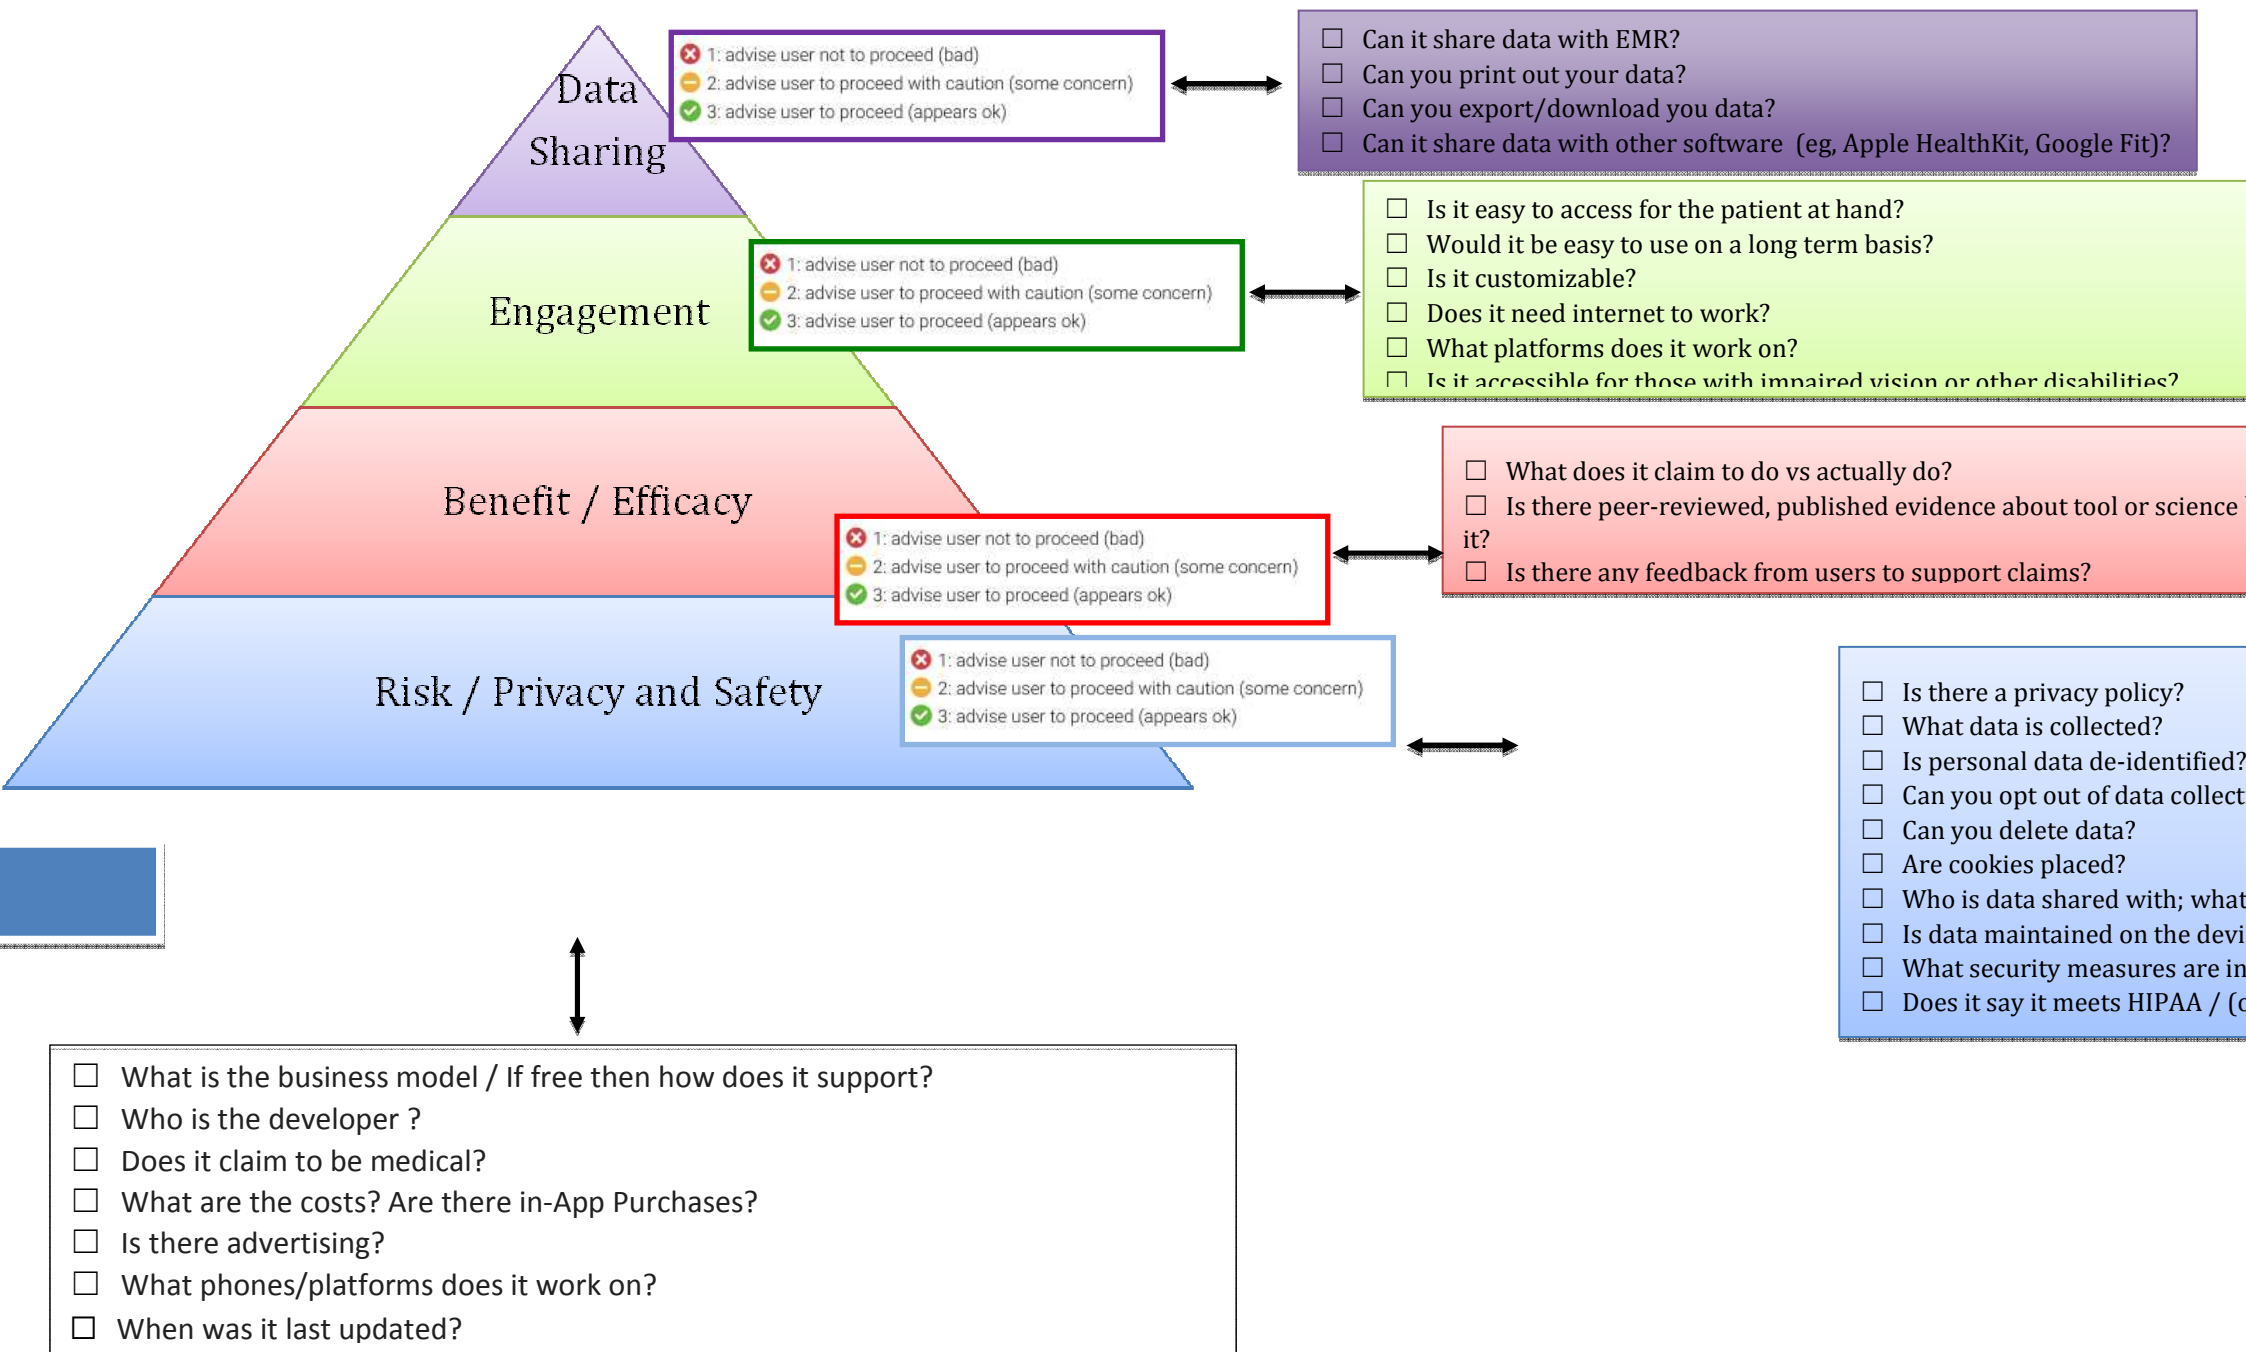

Supplement: appi.ps.201700423.ds001.pdf [file appi.ps.201700423.ds001.pdf]
